# Supplementary material
Source: PubMed Central journal article supplement (PMC7611729)
Supplement: EMS135435-supplement-Supplementary_material.pdf [file EMS135435-supplement-Supplementary_material.pdf]

---

**Supplementary information**

---

**Gating and modulation of a hetero-  
octameric AMPA glutamate receptor**

---

In the format provided by the  
authors and unedited

## Supplementary Figure

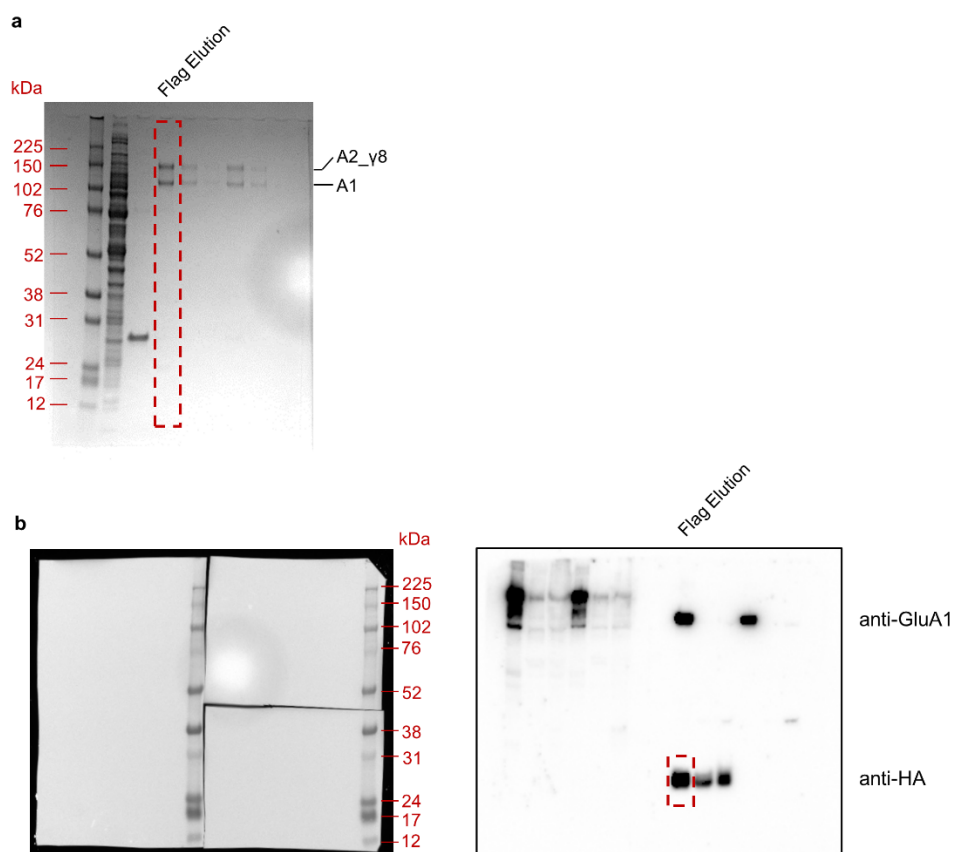

**Uncropped gel and immunoblots from Extended Data Fig1. a**, 4-12% Bis-Tris gel stained with coomassie blue, indicating elution of A1/2\_γ8/C2 purification. Image is used in Extended Data Fig 1b left panel. **b**, Immunoblots of CNIH2 by probing for the C-terminal HA tag. Image is used in Extended Data Fig 1b left panel.

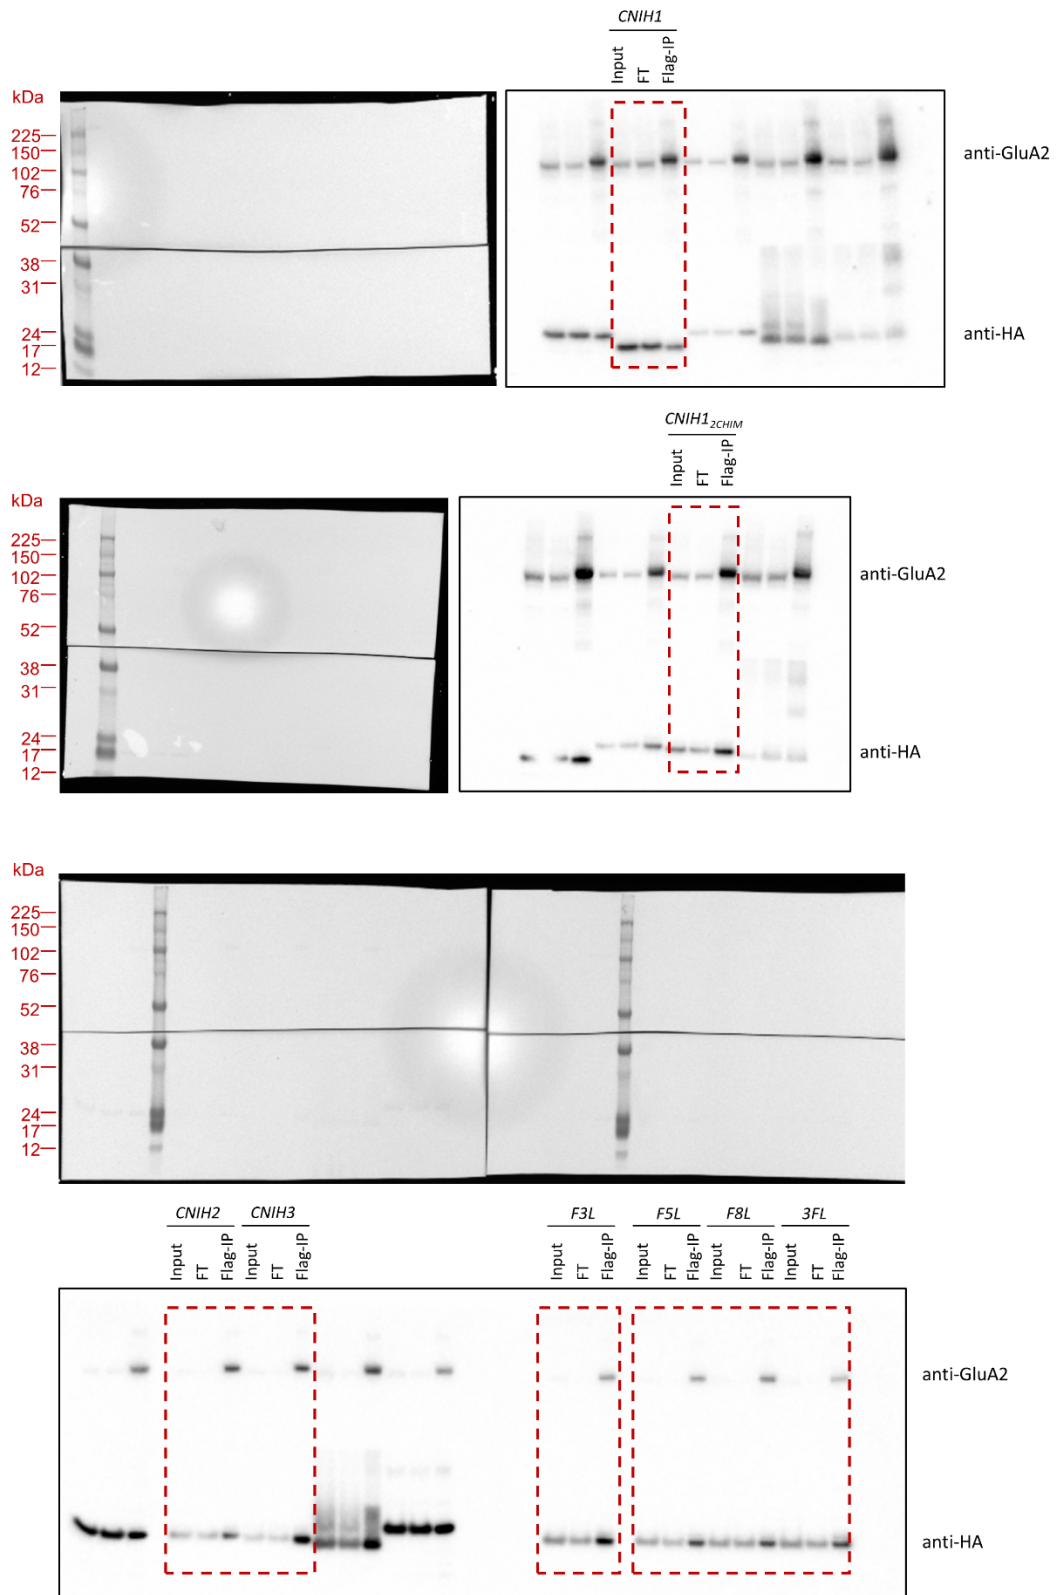

Used in Extended Data Figure 10a

### Uncropped immunoblots from Extended Data Fig10.

Immunoblots from Flag IP of CNIH homologues and CNIH2 mutants in complex with Flag tagged GluA2 homomers. Images are used in Extended Data Fig 10a.

**Supplementary Table 1. Electrophysiology P values, Figure 1 and Extended Data Figure 1**

| <b>Figure 1b &amp; Extended Data Figure 1a: GluA1/2_γ8+CNIH2 Recombinant receptors</b> |                        |                  |           |                     |
|----------------------------------------------------------------------------------------|------------------------|------------------|-----------|---------------------|
| Welch's ANOVA test; Dunnett's multiple comparisons – adjusted p values                 |                        |                  |           |                     |
| <i>Comparison</i>                                                                      | <i>Desensitisation</i> | <i>Rise time</i> | <i>RI</i> | <i>Eq'm Current</i> |
| GluA1/2 vs GluA1/2_γ8                                                                  | 0.0002                 | 0.0941           | 0.1120    | 0.0723              |
| GluA1/2 vs GluA1/2_γ8 + CNIH2                                                          | <0.0001                | 0.0527           | 0.2759    | 0.0083              |
| GluA1/2_γ8 vs GluA1/2_γ8 + CNIH2                                                       | 0.0003                 | 0.7232           | 0.6548    | 0.0567              |

| <b>Figure 1b &amp; Extended Data Figure 1a: Neuronal receptors</b>     |                        |                  |           |                     |
|------------------------------------------------------------------------|------------------------|------------------|-----------|---------------------|
| Welch's ANOVA test; Dunnett's multiple comparisons – adjusted p values |                        |                  |           |                     |
| <i>Comparison</i>                                                      | <i>Desensitisation</i> | <i>Rise time</i> | <i>RI</i> | <i>Eq'm Current</i> |
| CA1 - PC vs. CA1 - IN                                                  | 0.3687                 | 0.9993           | 0.3687    | 0.0002              |
| CA1 - PC vs. DG - GC                                                   | 0.9908                 | 0.0247           | 0.9908    | 0.0003              |
| CA1 - PC vs. CA3 - PC                                                  | 0.8330                 | 0.7584           | 0.8330    | 0.9634              |
| CA1 - IN vs. DG - GC                                                   | 0.5602                 | 0.1790           | 0.5602    | 0.9977              |
| CA1 - IN vs. CA3 - PC                                                  | 0.4393                 | 0.6645           | 0.4393    | 0.0190              |
| DG - GC vs. CA3 - PC                                                   | >0.9999                | 0.1098           | >0.9999   | 0.0334              |

**Supplementary Table 2. Electrophysiology P values, Figure 3 and Extended Data Figure 10**

| <b>Figure 3a &amp; Extended Data Figure 10d: CNIH2 FL mutations</b>             |                                   |                                   |
|---------------------------------------------------------------------------------|-----------------------------------|-----------------------------------|
| Welch's ANOVA test with Dunnett's multiple comparisons test – adjusted p values |                                   |                                   |
|                                                                                 | <i>Desensitisation (Figure 3)</i> | <i>Eq'm Current (Figure ED 9)</i> |
| GluA2Q + CNIH2 vs. GluA2Q                                                       | 0.0002                            | 0.0038                            |
| GluA2Q + CNIH2 vs. F3L                                                          | 0.0295                            | 0.0414                            |
| GluA2Q + CNIH2 vs. F5L                                                          | 0.0107                            | 0.0375                            |
| GluA2Q + CNIH2 vs. F8L                                                          | 0.0065                            | 0.0267                            |
| GluA2Q + CNIH2 vs. 3FL                                                          | 0.0003                            | 0.0049                            |

| <b>Figure 3c &amp; Extended Data Figure 10e: CNIH1/2 chimeric recordings</b>    |                                   |                                   |
|---------------------------------------------------------------------------------|-----------------------------------|-----------------------------------|
| Welch's ANOVA test with Dunnett's multiple comparisons test – adjusted p values |                                   |                                   |
|                                                                                 | <i>Desensitisation (Figure 3)</i> | <i>Eq'm Current (Figure ED 9)</i> |
| GluA2Q vs GluA2Q + CNIH1                                                        | 0.0016                            | 0.057                             |
| GluA2Q vs GluA2Q + CNIH1/2                                                      | <0.0001                           | <0.0001                           |
| GluA2Q vs GluA2Q + CNIH2                                                        | 0.0011                            | 0.0002                            |
| GluA2Q + CNIH1 vs GluA2Q<br>CNIH1/2                                             | <0.0001                           | 0.0003                            |
| GluA2Q + CNIH1 vs GluA2Q<br>CNIH2                                               | 0.0021                            | 0.0005                            |
| GluA2Q + CNIH1/2 vs GluA2Q<br>CNIH2                                             | 0.0362                            | 0.016                             |

**Supplementary Table 3. Immunology P values, Extended Data Figure 10b**

| <b>Extended Data Figure 10b: CNIH immunocytochemistry</b> |                             |                           |
|-----------------------------------------------------------|-----------------------------|---------------------------|
| Kruskal-Wallis test, Comparisons – adjusted p values      |                             |                           |
|                                                           | <i>Surface Fluorescence</i> | <i>Total Fluorescence</i> |
| No CNIH vs CNIH1                                          | <0.0001                     | <0.0001                   |
| No CNIH vs CNIH2                                          | <0.0001                     | <0.0001                   |
| No CNIH vs CNIH3                                          | <0.0001                     | <0.0001                   |
| No CNIH vs CNIH1/2chimera                                 | <0.0001                     | <0.0001                   |
| No CNIH vs CNIH2 F3L                                      | 0.0001                      | 0.0009                    |
| No CNIH vs CNIH2 F5L                                      | <0.0001                     | <0.0001                   |
| No CNIH vs CNIH2 F8L                                      | <0.0001                     | <0.0001                   |
| No CNIH vs CNIH2 3FL                                      | 0.1497                      | <0.0001                   |

| <b>Extended Data Figure 10b: CNIH immunocytochemistry</b> |                           |
|-----------------------------------------------------------|---------------------------|
| One Sample Wilcoxon test vs Median = 0                    |                           |
|                                                           | <i>Total Fluorescence</i> |
| CNIH1                                                     | <0.0001                   |
| CNIH2                                                     | <0.0001                   |
| CNIH3                                                     | <0.0001                   |
| CNIH1/2chimera                                            | <0.0001                   |
| CNIH2 F3L                                                 | <0.0001                   |
| CNIH2 F5L                                                 | <0.0001                   |
| CNIH2 F8L                                                 | <0.0001                   |
| CNIH2 3FL                                                 | <0.0001                   |
